# Supplementary material for: Nanoporous materials based on heteroleptic bilayers built up from bisphosphonium, p-sulfonatocalix[4]arene ions
Source: Royal Society of Chemistry journal article supplement (doi:10.1039/b706640f), 2007-09-17

## **Supporting Information**

### **Nanoporous material based on heteroleptic bilayers built up from bis- 575 phosphonium and *p*-sulfonato-calix[4]arene ions**

Mohamed Makha,\* Yatimah Alias, Colin L. Raston\* and Alexandre N. Sobolev

580

585

590

595

600

605

610

615

**1-Results of the combinatorial approach based on molar ratios of components: identification and characterisation of complexes 3-5**

620

| Code | SO <sub>3</sub> Na-calix[4]arene | (Ph <sub>3</sub> P <sup>+</sup> -CH <sub>2</sub> PhCH <sub>2</sub> -P <sup>+</sup> Ph <sub>3</sub> )<br>2Cl <sup>-</sup> | YbCl <sub>3</sub> .6H <sub>2</sub> O | pH   | σ<br>(mS/cm <sup>-1</sup> ) | Notes                           |
|------|----------------------------------|--------------------------------------------------------------------------------------------------------------------------|--------------------------------------|------|-----------------------------|---------------------------------|
| Z32  | 1                                | 1                                                                                                                        | 2                                    | 6.05 | 4.60                        | Structure complex 3 (2D porous) |
| Z42  | 1                                | 1                                                                                                                        | 3                                    | 6.08 | 4.70                        | Z42j – isostructural Z32        |

| Code | SO <sub>3</sub> Na-calix[4]arene | (Ph <sub>3</sub> P <sup>+</sup> -CH <sub>2</sub> PhCH <sub>2</sub> -P <sup>+</sup> Ph <sub>3</sub> )<br>2Cl <sup>-</sup> | Er(NO <sub>3</sub> ) <sub>3</sub> .5H <sub>2</sub> O | pH   | σ<br>(mS/cm <sup>-1</sup> ) | Notes                                  |
|------|----------------------------------|--------------------------------------------------------------------------------------------------------------------------|------------------------------------------------------|------|-----------------------------|----------------------------------------|
| Er42 | 1                                | 1                                                                                                                        | 3                                                    | 6.18 | 4.06                        | Structure complex 4 (Expanded Bilayer) |
| Er32 | 1                                | 1                                                                                                                        | 2                                                    | 6.20 |                             |                                        |

| Code | SO <sub>3</sub> Na-calix[4]arene | (Ph <sub>3</sub> P <sup>+</sup> -CH <sub>2</sub> PhCH <sub>2</sub> -P <sup>+</sup> Ph <sub>3</sub> )<br>2Cl <sup>-</sup> | Cs(NO <sub>3</sub> ) | pH   | σ<br>(mS/cm <sup>-1</sup> ) | Notes                                                             |
|------|----------------------------------|--------------------------------------------------------------------------------------------------------------------------|----------------------|------|-----------------------------|-------------------------------------------------------------------|
| Cs32 | 1                                | 1                                                                                                                        | 2                    | 9.14 | 5.37                        | Structure complex 5 (compact structure)<br>Isostructural to 4La3R |
| Cs42 | 1                                | 1                                                                                                                        | 3                    | 9.57 |                             |                                                                   |

| Code | SO <sub>3</sub> Na-calix[4]arene | (Ph <sub>3</sub> P <sup>+</sup> -CH <sub>2</sub> PhCH <sub>2</sub> -P <sup>+</sup> Ph <sub>3</sub> )<br>2Cl <sup>-</sup> | LaCl <sub>3</sub> .7H <sub>2</sub> O | pH   | σ<br>(mS/cm <sup>-1</sup> ) | Notes                      |
|------|----------------------------------|--------------------------------------------------------------------------------------------------------------------------|--------------------------------------|------|-----------------------------|----------------------------|
| 4La1 | 1                                | 1                                                                                                                        | 1                                    | 6.95 | 3.32                        |                            |
| 4La2 | 1                                | 1                                                                                                                        | 2                                    | 6.59 | 4.31                        |                            |
| 4La3 | 1                                | 1                                                                                                                        | 3                                    | 6.57 | 3.89                        | isostructural to complex 5 |
| 4La4 | 1                                | 2                                                                                                                        | 1                                    | 6.72 | 4.20                        |                            |

625

| Code | SO <sub>3</sub> Na-calix[4]arene | (Ph <sub>3</sub> P <sup>+</sup> -CH <sub>2</sub> PhCH <sub>2</sub> -P <sup>+</sup> Ph <sub>3</sub> )<br>2Cl <sup>-</sup> | GdCl <sub>3</sub> .6H <sub>2</sub> O | pH   | σ<br>(mS/cm <sup>-1</sup> ) | Notes               |
|------|----------------------------------|--------------------------------------------------------------------------------------------------------------------------|--------------------------------------|------|-----------------------------|---------------------|
| W1   | 1                                | 0                                                                                                                        | 1                                    | 6.36 | 2.13                        |                     |
| W2   | 1                                | 1                                                                                                                        | 1                                    | 6.12 | 2.16                        |                     |
| W4   | 1                                | 3                                                                                                                        | 1                                    | 6.22 | 3.74                        | Too small unit cell |
| W6   | 1                                | 5                                                                                                                        | 1                                    | 6.37 | 4.45                        | Too small unit cell |
| X1   | 1                                | 1                                                                                                                        | 0                                    | 8.25 | 1.39                        |                     |
| X4   | 1                                | 1                                                                                                                        | 3                                    | 6.41 | 4.78                        |                     |
| X6   | 1                                | 1                                                                                                                        | 5                                    | 6.34 | 6.68                        |                     |

630

| Code | SO <sub>3</sub> Na-calix[4]arene | (Ph <sub>3</sub> P <sup>+</sup> -CH <sub>2</sub> PhCH <sub>2</sub> -P <sup>+</sup> Ph <sub>3</sub> )<br>2Cl <sup>-</sup> | YbCl <sub>3</sub> .6H <sub>2</sub> O | pH   | σ<br>(mS/cm <sup>-1</sup> ) | Notes               |
|------|----------------------------------|--------------------------------------------------------------------------------------------------------------------------|--------------------------------------|------|-----------------------------|---------------------|
| Y1   | 1                                | 0                                                                                                                        | 1                                    | 6.22 | 1.71                        |                     |
| Y2   | 1                                | 1                                                                                                                        | 1                                    | 6.14 | 2.05                        |                     |
| Y4   | 1                                | 3                                                                                                                        | 1                                    | 5.59 | 3.52                        | Too small unit cell |
| Y6   | 1                                | 5                                                                                                                        | 1                                    | 6.17 | 4.52                        | Too small unit cell |
| Z1   | 1                                | 1                                                                                                                        | 0                                    | 8.90 | 1.58                        |                     |

|    |   |   |   |      |      |  |
|----|---|---|---|------|------|--|
| Z4 | 1 | 1 | 3 | 6.10 | 4.87 |  |
| Z6 | 1 | 1 | 5 | 6.18 | 6.43 |  |

| Code | SO <sub>3</sub> Na-calix[4]arene | (Ph <sub>3</sub> P <sup>+</sup> -CH <sub>2</sub> PhCH <sub>2</sub> -P <sup>+</sup> Ph <sub>3</sub> )<br>2Cl <sup>-</sup> | GdCl <sub>3</sub> .6H <sub>2</sub> O | pH   | σ<br>(mS/cm <sup>-1</sup> ) | Notes |
|------|----------------------------------|--------------------------------------------------------------------------------------------------------------------------|--------------------------------------|------|-----------------------------|-------|
| X32  | 1                                | 1                                                                                                                        | 2                                    | 6.14 | 2.25                        |       |
| X42  | 1                                | 1                                                                                                                        | 3                                    | 6.21 | 4.88                        |       |

**Molar ratios of tectons (Sulfonato-calix[4]arene: (Ph<sub>3</sub>P<sup>+</sup>-CH<sub>2</sub>PhCH<sub>2</sub>-P<sup>+</sup>Ph<sub>3</sub>: Ln<sup>3+</sup>) at different pH**

635

| Code   | SO <sub>3</sub> Na-calix[4]arene | (Ph <sub>3</sub> P <sup>+</sup> -CH <sub>2</sub> PhCH <sub>2</sub> -P <sup>+</sup> Ph <sub>3</sub> )<br>2Cl <sup>-</sup> | GdCl <sub>3</sub> .6H <sub>2</sub> O | pH<br>(a) | pH   | σ<br>(mS/cm <sup>-1</sup> ) | Notes |
|--------|----------------------------------|--------------------------------------------------------------------------------------------------------------------------|--------------------------------------|-----------|------|-----------------------------|-------|
| X32pH4 | 1                                | 1                                                                                                                        | 2                                    | 5.92      | 3.59 | 8.50                        |       |
| X42pH4 | 1                                | 1                                                                                                                        | 3                                    | 5.83      | 4.01 | 7.14                        |       |
| X32pH2 | 1                                | 1                                                                                                                        | 2                                    | 5.81      | 1.59 | 14.20                       |       |
| X42pH2 | 1                                | 1                                                                                                                        | 3                                    | 5.78      | 2.33 | 10.05                       |       |

| Code   | SO <sub>3</sub> Na-calix[4]arene | (Ph <sub>3</sub> P <sup>+</sup> -CH <sub>2</sub> PhCH <sub>2</sub> -P <sup>+</sup> Ph <sub>3</sub> )<br>2Cl <sup>-</sup> | YbCl <sub>3</sub> .6H <sub>2</sub> O | pH<br>(a) | pH   | σ<br>(mS/cm <sup>-1</sup> ) | Notes |
|--------|----------------------------------|--------------------------------------------------------------------------------------------------------------------------|--------------------------------------|-----------|------|-----------------------------|-------|
| Z32pH4 | 1                                | 1                                                                                                                        | 2                                    | 5.72      | 3.57 | 7.21                        |       |
| Z42pH4 | 1                                | 1                                                                                                                        | 3                                    | 5.65      | 3.91 | 7.66                        |       |
| Z32pH2 | 1                                | 1                                                                                                                        | 2                                    | 5.91      | 2.15 | 10.11                       |       |
| Z42pH2 | 1                                | 1                                                                                                                        | 3                                    | 5.66      | 1.83 | 14.77                       |       |

| Code    | SO <sub>3</sub> Na-calix[4]arene | (Ph <sub>3</sub> P <sup>+</sup> -CH <sub>2</sub> PhCH <sub>2</sub> -P <sup>+</sup> Ph <sub>3</sub> )<br>2Cl <sup>-</sup> | Er(NO <sub>3</sub> ) <sub>3</sub> .5H <sub>2</sub> O | pH<br>(a) | pH   | σ<br>(mS/cm <sup>-1</sup> ) | Notes |
|---------|----------------------------------|--------------------------------------------------------------------------------------------------------------------------|------------------------------------------------------|-----------|------|-----------------------------|-------|
| Er32pH4 | 1                                | 1                                                                                                                        | 2                                                    | 6.06      | 3.89 | 8.23                        |       |
| Er42pH4 | 1                                | 1                                                                                                                        | 3                                                    | 5.87      | 3.74 | 7.39                        |       |
| Er32pH2 | 1                                | 1                                                                                                                        | 2                                                    | 6.11      | 2.04 | 11.84                       |       |
| Er42pH2 | 1                                | 1                                                                                                                        | 3                                                    | 5.98      | 2.28 | 9.79                        |       |

| Code    | SO <sub>3</sub> Na-calix[4]arene | (Ph <sub>3</sub> P <sup>+</sup> -CH <sub>2</sub> PhCH <sub>2</sub> -P <sup>+</sup> Ph <sub>3</sub> )<br>2Cl <sup>-</sup> | Cs(NO <sub>3</sub> ) | pH<br>(a) | pH   | σ<br>(mS/cm <sup>-1</sup> ) | Notes |
|---------|----------------------------------|--------------------------------------------------------------------------------------------------------------------------|----------------------|-----------|------|-----------------------------|-------|
| Cs32pH4 | 1                                | 1                                                                                                                        | 2                    | 9.60      | 3.94 | 7.46                        |       |
| Cs42pH4 | 1                                | 1                                                                                                                        | 3                    | 9.58      | 3.27 | 9.69                        |       |
| Cs32pH2 | 1                                | 1                                                                                                                        | 2                    | 9.54      | 2.22 | 11.52                       |       |
| Cs42pH2 | 1                                | 1                                                                                                                        | 3                    | 9.57      | 2.12 | 13.55                       |       |

640

645

650

655 **2- Assessment of porosity in complex 3**

(A) Crystal images of complex 3, (B) crystals of complex 3 soaked in 2M HCl; (C) Isolated and dried crystals of complex 3 after HCl treatment and (D) crystals of complex 3 turned dark brown instantly after exposure to iodine (iodine is recovered from the crystals upon exposure to acetone).

660

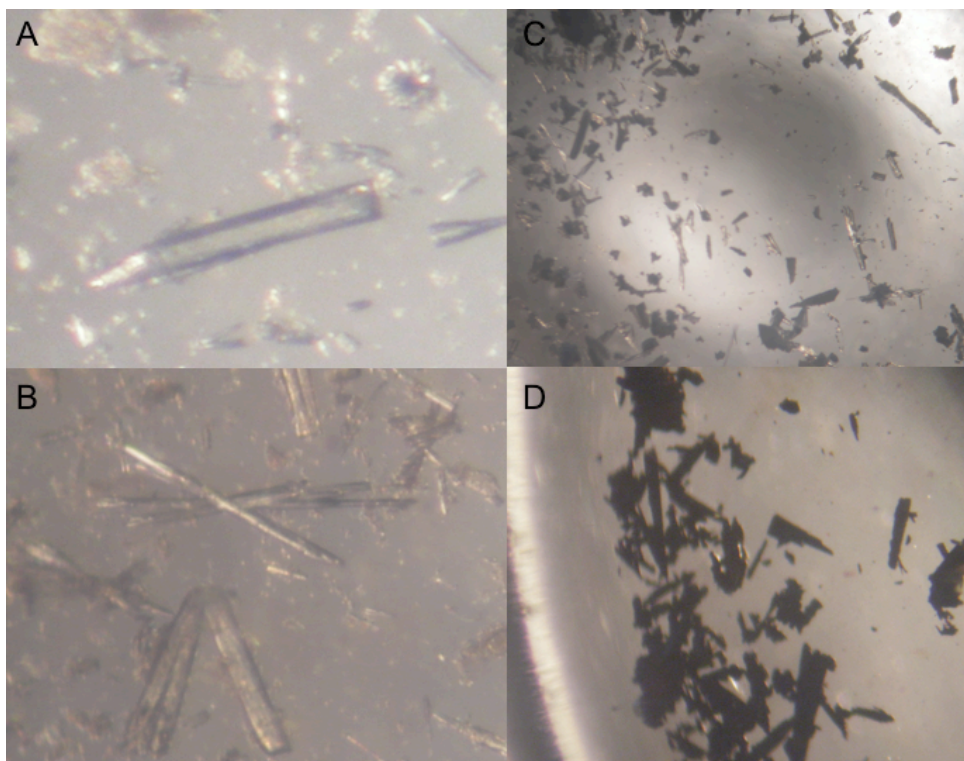

**3- ICP records on HCl leaching of Ytterbium**

665

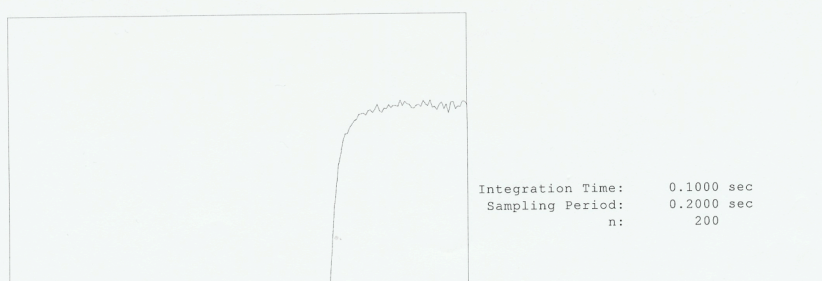

670

| m/z | Range      | Count      | Mean      | RSD%   |
|-----|------------|------------|-----------|--------|
| 174 | 50,000,000 | 30068120.0 | 8496536.0 | 153.03 |
| 171 | 20,000,000 | 13227383.0 | 3744787.3 | 153.81 |

675

```

Tuning Parameters
===Plasma Condition===
RF Power : 1500 W
RF Matching : 1.8 V
Smpl Depth : 6 mm
Torch-H : -1.3 mm
Torch-V : 1.1 mm
Carrier Gas : 0.91 L/min
Makeup Gas : 0.2 L/min
Optional Gas : 0 %
Nebulizer Pump : 0.15 rps
Sample Pump : -- rps
S/C Temp : 2 degC

===Ion Lenses===
Extract 1 : 4 V
Extract 2 : -100.5 V
Omega Bias-cs : -32 V
Omega Lens-cs : 8 V
Cell Entrance : -26 V
QP Focus : 2 V
Cell Exit : -42 V

===Q-Pole Parameters===
AMU Gain : 130
AMU Offset : 124
Axis Gain : 1.0004
Axis Offset : -0.02
QP Bias : -3 V

===Detector Parameters===
Discriminator : 8 mV
Analog HV : 1940 V
Pulse HV : 1520 V

===Reaction Cell===
Reaction Mode : OFF
H2 Gas : 0 mL/min
He Gas : 0 mL/min
Optional Gas : --- %
    
```

680

685 **4- TGA analysis on complex 3 with crystals retained morphology at 600 °C**

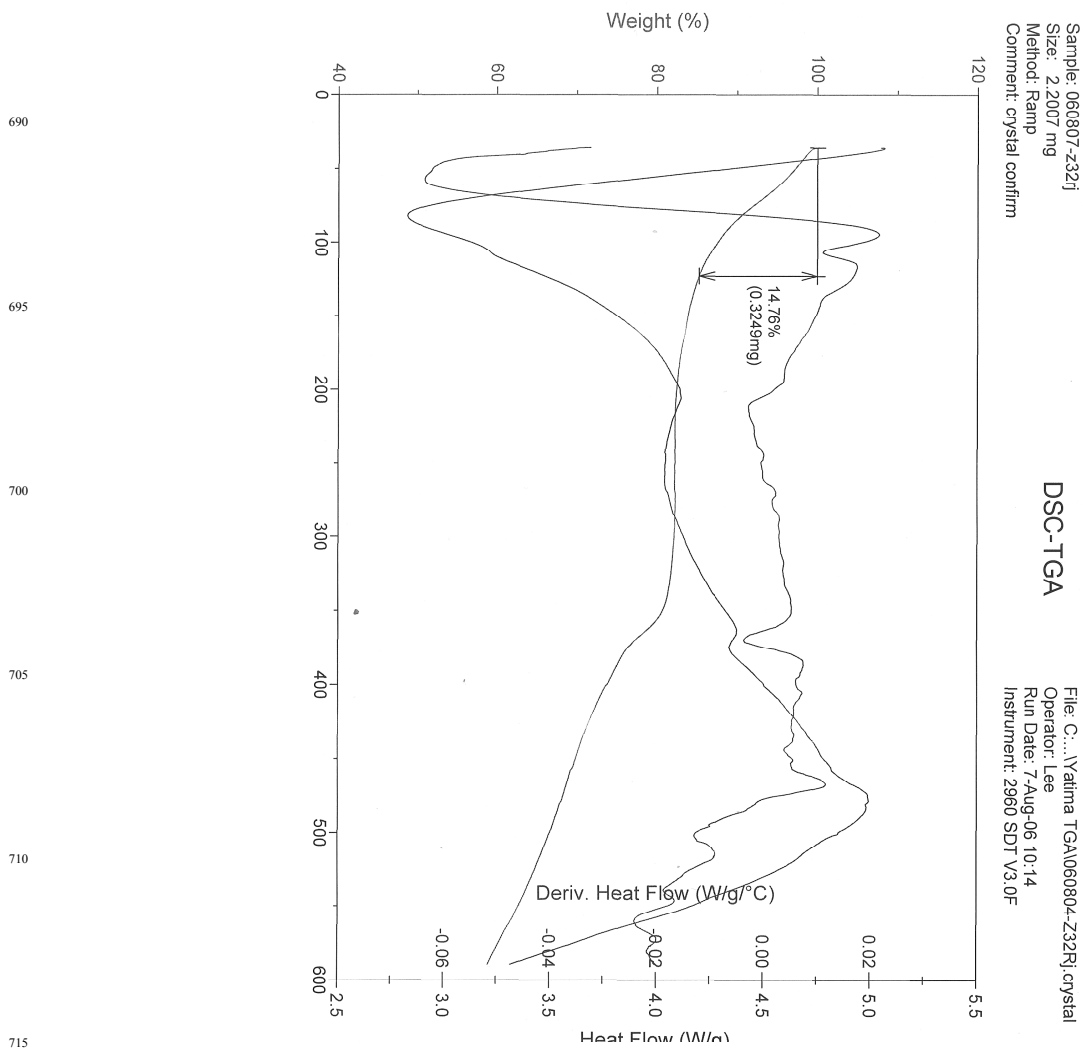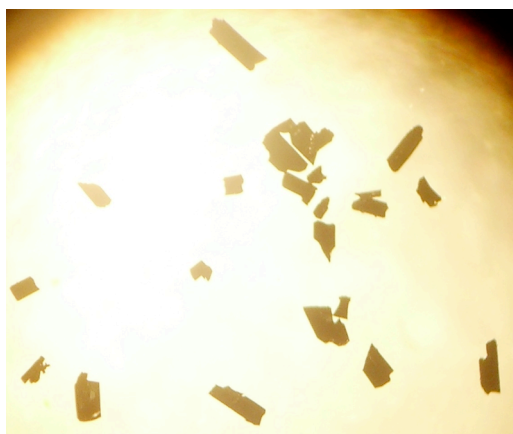

5- <sup>13</sup>C MASS, <sup>31</sup>P MASS NMR and TGA data on complex 5

725

730

735

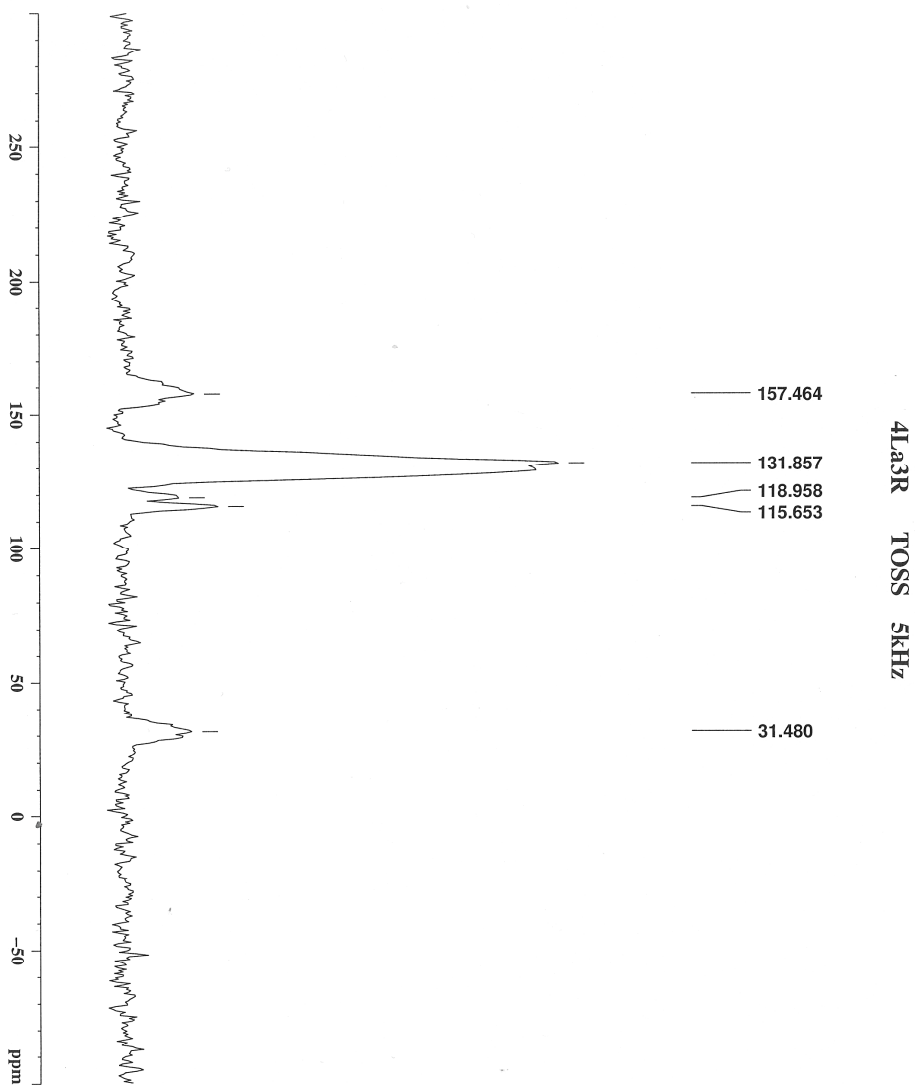

Current Data Parameters  
 NAME Y-41.33R  
 EXPNO 3  
 PROCNO 1  
 F2 - Acquisition Parameters  
 Date\_ 20060621  
 Time 0:10  
 INSTRUM spect  
 PULPROG 5 mm DUAL H1  
 PL1PROG zgpg30  
 TD 1024  
 SOLVENT CDCl3  
 NS 640  
 DS 0  
 SWH 41666.668 Hz  
 FIDRES 40.690105 Hz  
 AQ 0.0123380 sec  
 RG 8192  
 DW 12.000 usec  
 DE 17.14 usec  
 TE 300.2 K  
 L1 5000  
 L2 8.00 usec  
 P3 4.50 usec  
 D5 0.00000857 sec  
 D1 2.00000000 sec  
 TL1 3.00 dB  
 DL2 5.37 dB  
 SFO2 300.1355000 MHz  
 DECNUC 1H  
 P15 2000.000 usec  
 D11 0.0000357 sec  
 D12 0.0000002 sec  
 D13 0.0001084 sec  
 D14 0.0001838 sec  
 D15 0.0000329 sec  
 SFO1 75.4764457 MHz  
 NUCLEUS 13C  
 F2 - Processing parameters  
 SI 1024

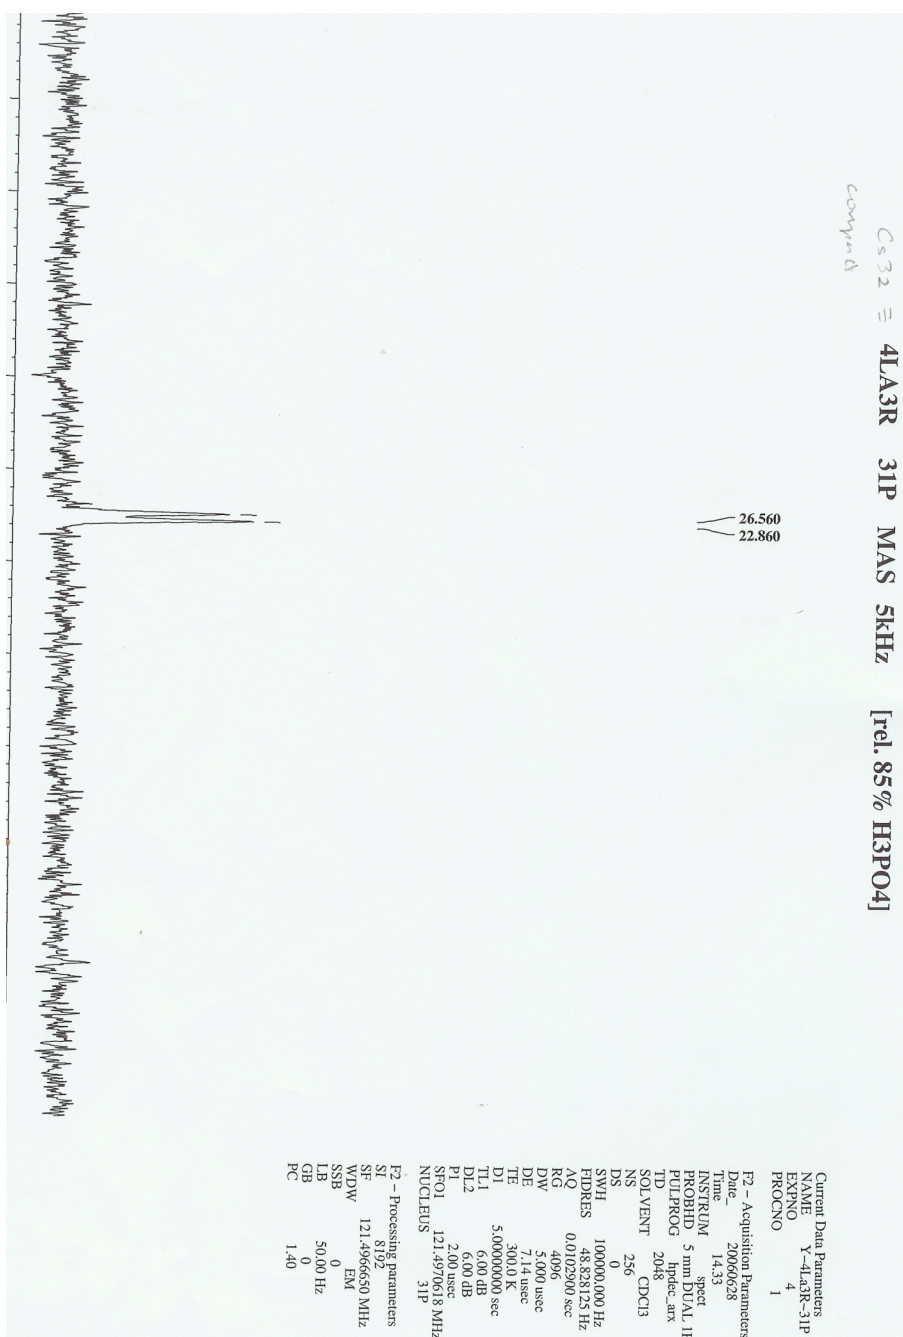

740

745

750

Sample: 060807-4La3R.001  
Size: 8.2633 mg  
Method: Ramp  
Comment: crystal confirm

### DSC-TGA

File: C:\Yatima TGA\060804.4La3R.001  
Operator: Lee  
Run Date: 7-Aug-06 11:37  
Instrument: 2960 SDT V3.0F

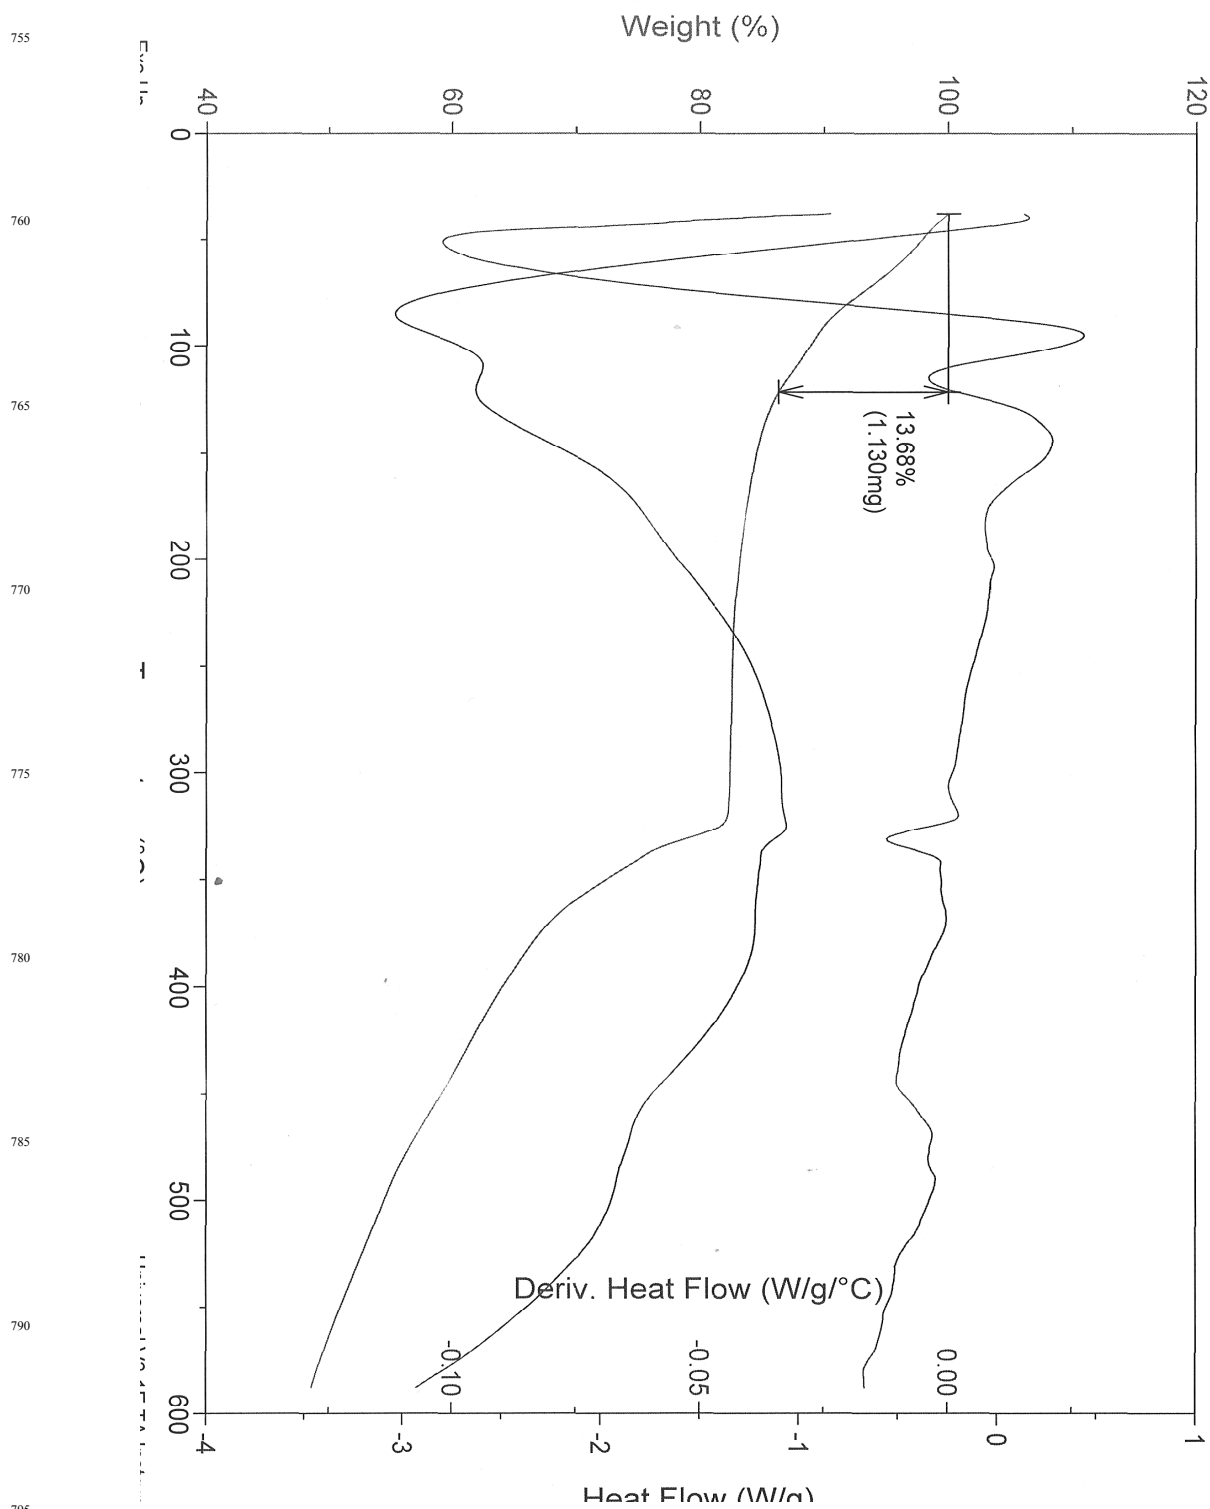

Supplement: b706640f.pdf [file b706640f.pdf]
